# Supplementary material for: Lentil-Based Yogurt Alternatives Fermented with Multifunctional Strains of Lactic Acid Bacteria—Techno-Functional, Microbiological, and Sensory Characteristics
Source: MDPI journal article supplement (doi:10.3390/foods11142013), 2022-07-07
Supplement: s1 [file s1]

# Lentil-based yogurt alternatives fermented with multifunctional strains of lactic acid bacteria – techno-functional, microbiological, and sensory characteristics

Theresa Boeck <sup>1</sup>, Lilit Ispiryan <sup>1</sup>, Andrea Hoehnel <sup>1</sup>, Aylin W. Sahin <sup>1</sup>, Aidan Coffey <sup>2,3</sup>, Emanuele Zannini <sup>1,\*</sup>, and Elke K. Arendt <sup>1,3</sup>

1 School of Food and Nutritional Sciences, University College Cork, Cork, Ireland; [theresa.boeck@umail.ucc.ie](mailto:theresa.boeck@umail.ucc.ie) (T.B.); [lispiryan@ucc.ie](mailto:lispiryan@ucc.ie) (L.I.); [andrea.hoehnel@ucc.ie](mailto:andrea.hoehnel@ucc.ie) (A.H.); [aylin.sahin@ucc.ie](mailto:aylin.sahin@ucc.ie) (A.W.S.);

2 Department of Biological Sciences, Munster Technological University, Cork, Ireland; [aidan.coffey@mtu.ie](mailto:aidan.coffey@mtu.ie) (A.C.)

3 APC Microbiome Ireland, University College Cork, Ireland; [e.arendt@ucc.ie](mailto:e.arendt@ucc.ie) (E.K.A.)

\* Correspondence: [e.zannini@ucc.ie](mailto:e.zannini@ucc.ie) (E.Z.)

Figure S1: Questionnaire used for sensory analysis.



**UCC**  
University College Cork, Ireland  
Coláiste na hOllscoile Corcaigh

**Descriptive Sensory Evaluation**



**smart protein**

**Personal Data**

Name: ..... Date: .....

**Information**

- Please do not smoke and/or drink coffee 1 hour before the test.
- The samples are lentil protein emulsions fermented with lactic acid bacteria. The following traces of allergens may be present: gluten, peanuts, tree nuts, celery, mustard, eggs, milk, sesame, fish, lupin, soya, sulphites, crustaceans, molluscs.
- All information provided is confidential and the results will not be associated with your name.
- The products have been produced under safe and food grade conditions.

Please confirm that (tick the circle)

☐ You are aware that the participation in this sensory evaluation is voluntary.

☐ You are aware that products may contain the allergens reported above.

**Guidelines**

Please taste the samples for the attributes reported in Table 1. In between each sample, please cleanse your palate with water. Following the example below, please place a line on where you estimate the intensity of the attribute. Adding comments is optional.

**Example:**



| Attribute                          | Description                                                                                                                  | Intensity              |
|------------------------------------|------------------------------------------------------------------------------------------------------------------------------|------------------------|
| <b>Odour – Overall intensity</b>   | The intensity of the odour of the sample.                                                                                    | 0 = low, 10 = high     |
| <b>Odour – Yoghurt-like</b>        | The odour of plain dairy yoghurt.                                                                                            | 0 = none, 10 = extreme |
| <b>Flavour – Overall intensity</b> | The intensity of the flavour/taste of the sample                                                                             | 0 = low, 10 = high     |
| <b>Flavour - Sour</b>              | The basic taste, perceived on the tongue, stimulated by acids, such as citric acid, lactic acid or acetic acid.              | 0 = none, 10 = extreme |
| <b>Flavour – Bitter</b>            | The basic taste, perceived on the tongue, stimulated by substances like caffeine or quinine                                  | 0 = none, 10 = extreme |
| <b>Flavour - Beany</b>             | The flavour of cooked or canned pulses such as beans or lentils.                                                             | 0 = none, 10 = extreme |
| <b>Flavour - Yoghurt-like</b>      | The flavour of plain dairy yoghurt.                                                                                          | 0 = none, 10 = extreme |
| <b>Flavour - Sour cream-like</b>   | The flavour of plain, dairy-based sour cream.                                                                                | 0 = none, 10 = extreme |
| <b>Mouthfeel - Firmness</b>        | The force required to break up the sample with the tongue.                                                                   | 0 = low, 10 = high     |
| <b>Mouthfeel - Smoothness</b>      | The degree of melting and dissolving in the mouth, corresponding to creaminess, without the sensation of lumps or particles. | 0 = low, 10 = high     |
| <b>Aftertaste</b>                  | Persistence of the taste in the mouth after swallowing.                                                                      | 0 = none, 10 = extreme |

*Table 1: Attributes for sensory evaluation, and their descriptions.*

*Sensory Evaluation Fermented Lentil Protein*

**Figure S2:** Stribeck curves of the samples for a sliding speed from  $1 \times 10^{-8}$  to 1 m/s. Every curve is the average of triplicates. Error bars have been omitted for clarity

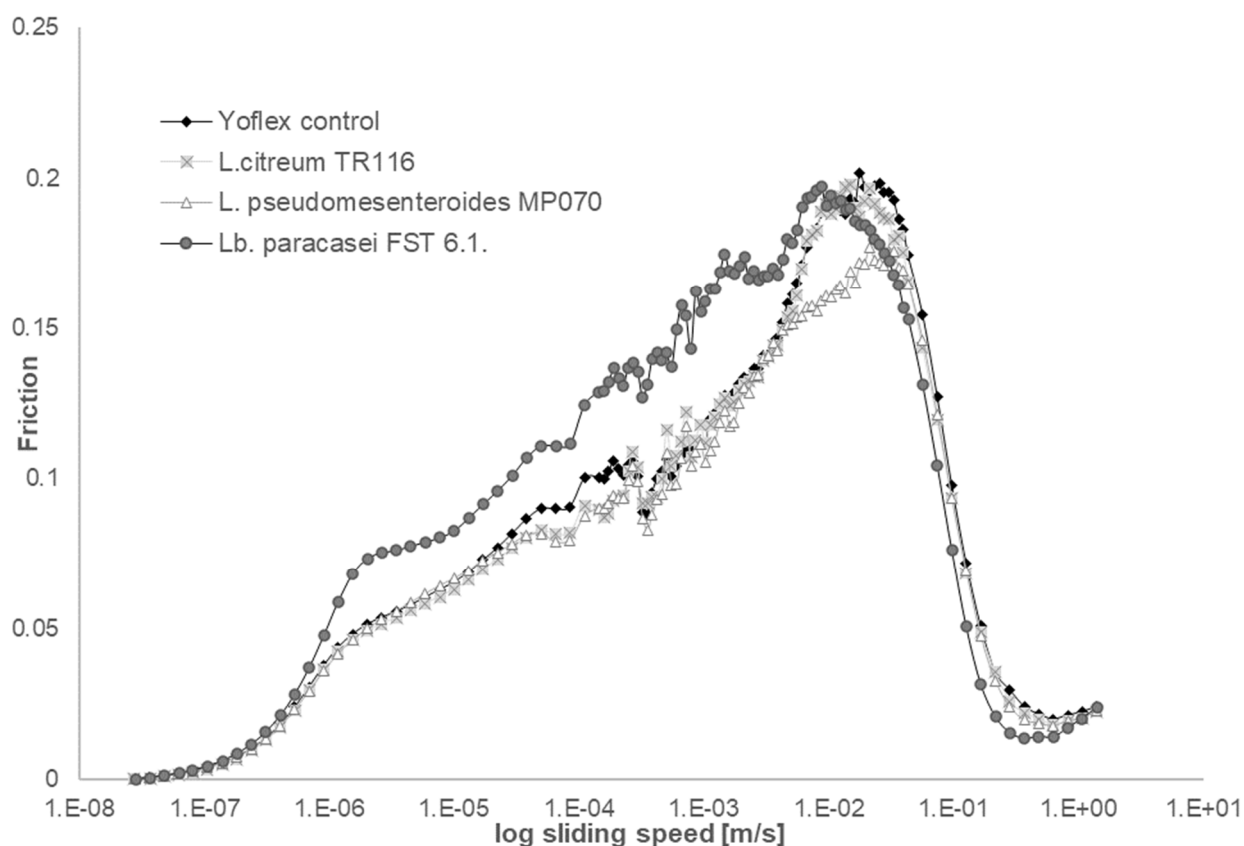

**Table S1:** Variables calculated from tribological measurements. For definition of variables, see main manuscript, Figure 1.

|                | Var 1 [-]   |         | Var 2 [-] |        | Var 3 [-]   |         |
|----------------|-------------|---------|-----------|--------|-------------|---------|
| LcTR116        | 0.114       | 0.011a  | 0.092     | 0.010a | 0.203       | 0.010a  |
| LpMP070        | 0.11        | 0.008a  | 0.086     | 0.014a | 0.178       | 0.020a  |
| LbpFST6.1      | 0.053       | 0.076a  | 0.112     | 0.001a | 0.197       | 0.006a  |
| Yoflex control | 0.115       | 0.010a  | 0.098     | 0.015a | 0.202       | 0.013a  |
|                | Var 4 [m/s] |         | Var 5 [-] |        | Var 6 [m/s] |         |
| LcTR116        | 0.018       | 0.003a  | 0.018     | 0.001a | 0.751       | 0.205ab |
| LpMP070        | 0.023       | 0.007ab | 0.018     | 0.001a | 0.633       | 0.000a  |
| Lbp6.1         | 0.009       | 0.000b  | 0.013     | 0.001b | 0.406       | 0.036b  |
| Yoflex         | 0.020       | 0.004ab | 0.02      | 0.001a | 0.633       | 0.000a  |

*Note:* Mean values  $\pm$  standard deviation. Values in the same column followed by the same superscript letters are not significantly different ( $p > 0.05$ ).
